# Supplementary material for: Empowering Kuwaiti adults with cancer: oncology nurses’ perspectives on home-based self-management
Source: Research Square preprint supplement (doi:10.21203/rs.3.rs-6890966/v1), 2025-08-05
Supplement: Supplementary file 1 [file 0a45c8e57f8d73c1afc20b6d.docx]

| **First Participants (NURSES)** |  |  |  |  |
| --- | --- | --- | --- | --- |
| **Step 1: Initial Coding**  In the initial coding phase, I broke down the data into small parts, labeling phrases and sentences that reflect the participants' experiences. Here are some initial codes identified from the interviews: | **Step 2: Focused Coding**  In this stage, I grouped initial codes into broader categories to identify patterns and relationships in the data. | **Step 3: Theoretical Coding**  In this phase, I linked the focused categories to develop a core category that explains the phenomenon. |  |  |
| 1. **Radiation care focus** - “We mainly focus on radiation care. After care of patients receiving radiotherapy.” 2. **Rare colorectal cancer cases** - “In my experience, I can say I get one case per month.” 3. **Collaborative teaching with stoma nurse** - “In collaboration with her, we give health teaching regarding how to take care of colostomy bags.” 4. **Patient side effects management** - “Colorectal patients, their radiation will be pelvic region, some will have constipation, some other will have diarrhea.” 5. **Patient compliance** - “It depends on communication. Some patients understand English…others, we translate.” 6. **Health education focus** - “Upon discharge, we give proper health education related to compliance with medication and the importance of follow up.” 7. **Barriers in communication** - “The main barrier is communication. Some patients do not understand English.” 8. **Staff shortage and time constraints** - “Nowadays we face a lot of staff shortage. So, it is very difficult to find time.” 9. **Need for audiovisual aids** - “If we get more resources like audiovisual aids, we could help them understand better.” 10. **Psychological support lacking** - “They need psychological support, most patients will be depressed due to their condition, and psychological support is lacking.” | **Category 1: Health Education and Empowerment**   - **Quotes:**   - “Upon discharge, we give proper health education related to compliance with medication and the importance of follow up.”   - “We teach them the importance of drinking plenty of water…staying well hydrated.”   - “In collaboration with her, we give health teaching regarding how to take care of colostomy bags.”   **Category 2: Barriers to Effective Care**   - **Quotes:**   - “The main barrier is communication. Some patients do not understand English.”   - “Nowadays we face a lot of staff shortage. So, it is very difficult to find time.”   - “If we get more resources like audiovisual aids, we could help them understand better.”   **Category 3: Emotional and Psychological Support**   - **Quotes:**   - “They need psychological support, most patients will be depressed due to their condition.”   - “We will inform the doctor and refer the patient to the psychiatrist or the Al Sidra team.”   **Category 4: Patient Compliance and Self-management**   - **Quotes:**   - “Some patients, they understand English…others, we translate.”   - “We do that. Colostomy patients, we ask them to do it in front of us. Some patients do that.”   - “They will not comply with the treatment. Some patients may not obey what the family says because they are depressed.”   **Category 5: Physical Side Effects and Symptom Management**   - **Quotes:**   - “Colorectal patients, their radiation will be pelvic region, some will have constipation, some other will have diarrhea.”   - “We tell them to take small and frequent food…we provide them antiemetics according to the doctor’s order.” | **Core Category: Empowering Cancer Patients through Education Amidst Barriers**  The central focus is the commitment of healthcare providers to educate and empower cancer patients, despite facing several challenges. Nurses emphasize health education, especially related to treatment compliance, side effects management, and self-care at home. However, barriers such as language difficulties, lack of time due to staffing shortages, and insufficient educational resources (e.g., audiovisual aids) hinder the effectiveness of this empowerment process. |  |  |
| **Second Participant** |  |  |  |  |
| **1. Initial Coding**  quotes from participants:  • End-of-life care: “patients admitted at the last stage of life.”  • Types of cancer treated: “We have cases mostly Ca cervix, hematology, Leukemia, PNS, Head and neck, and Ca breast.”  • Overflow management: “sometimes we don’t have [patients], but when ward 7 is full, we are admitting their patients.”  • Admission based on complications: “side effects occur, doctor decides to admit.”  • Providing emotional care: “emotional support.”  • Non-pharmacological pain management: “deep breathing, breathing exercises, TV programs.”  • Fear-driven treatment decisions: “patients prefer mastectomy due to fear of recurrence.”  • Faith-based emotional support: “spiritual support for coping.”  • Post-surgery body image issues: “concerns about body image and husband’s reaction.”  • Community and external support: “wigs and financial support provided by Al-Sidra group.” | **2. Focused Coding**  • Care Coordination: Focuses on how patients transition between different wards (e.g., radiotherapy and chemotherapy).  o Codes: Overflow management, bed availability, admission based on complications.  o Quote: “sometimes we don’t have [patients], but when ward 7 is full, we are admitting their patients.”  • Psychosocial and Emotional Care: Highlights emotional and spiritual care.  o Codes: Emotional support, faith-based emotional support, non-pharmacological pain management.  o Quotes: “emotional support,” “spiritual support for coping,” “deep breathing, breathing exercises, TV programs.”  • Patient Empowerment and Education: Refers to educating patients and caregivers for self-management.  o Codes: Teaching patients about managing pain at home, empowering caregivers with practical skills.  o Quote: “We teach the caregivers how to manage at home after discharge.”  • Treatment Choices Driven by Fear: Focuses on patients opting for more radical treatments out of fear.  o Codes: Fear of recurrence, patient-driven treatment decisions.  o Quote: “patients prefer mastectomy due to fear of recurrence.”  • Body Image and Social Concerns: Addresses concerns related to body image and personal relationships post-surgery.  o Codes: Post-surgery body image issues, concerns about husband’s reaction.  o Quote: “concerns about body image and husband’s reaction.” | 3. **Theoretical Coding**  • Care Coordination and Emotional Care: Care coordination between wards can add emotional stress to patients, requiring emotional support during transitions.  o Quote: “patients admitted at the last stage of life” combined with “emotional support.”  • Patient Empowerment and Education: Empowerment through education helps patients self-manage and cope emotionally at home, linking medical and psychosocial care.  o Quote: “We teach the caregivers how to manage at home” with “deep breathing, breathing exercises, TV programs.”  • Fear-driven Treatment Choices: Fear impacts treatment decisions, like mastectomy, which connects to both psychosocial support and body image concerns.  o Quote: “patients prefer mastectomy due to fear of recurrence” tied with “concerns about body image and husband’s reaction.”  • Community and External Support: External support such as from Al-Sidra group offers crucial emotional and financial relief for both patients and caregivers.  o Quote: “wigs and financial support provided by Al-Sidra group.”  4. Core Category  The core category ties everything together, encapsulating the central theme of the data:  **Core Category:** Comprehensive Cancer Care through Emotional, Educational, and Spiritual Support  This core category emphasizes how cancer care extends beyond physical treatment to include emotional, spiritual, and educational support. The interplay between managing medical complications, emotional well-being, and empowering both patients and caregivers forms the heart of oncology nursing.  • Quote: “patients admitted at the last stage of life” (medical), “emotional support” (emotional), “spiritual support for coping” (spiritual), and “We teach the caregivers how to manage at home” (educational). |  |  |
| **Third Participant** |  |  |  |  |
| **Initial Coding**  • Different cancer types: "We see patients with breast cancer, colorectal cancer, uterine, and pelvic cancers... even lymphoma."  • Preoperative and postoperative care: "We monitor them closely after surgery, especially those with colostomies or post-mastectomy."  • Patient demographics: "Most of our patients are elderly, but we also have young women with breast cancer."  • Health education: "Some patients refuse colostomy bags, despite our education efforts. Others accept it after we explain the importance."  • Socioeconomic factors: "Patients from lower socioeconomic backgrounds often don’t follow up because they can't afford the medications or care."  • Educational level impact: "The more educated patients understand faster and cooperate better with their treatment."  • Emotional impact: "Breast cancer patients often fall into depression after surgery... It’s hard for them to deal with the changes in their appearance."  • Stage of cancer: "We mostly see patients in the second to fourth stages of cancer, many of them requiring palliative care."  • Psychological support: "We have only one psychiatrist available, and the patients really need group therapy, but it's not enough."  • Nurse-patient assignment: "We try to assign staff who speak the same language or understand the patient’s culture, especially with the foreign patients."  • Patient empowerment: "We teach them how to take care of their stoma, how to do exercises after breast cancer surgery, and to be independent."  • Family involvement: "We also train the caregivers so they can support the patient once they are discharged."  • Challenges in education: "Language barriers make it hard to explain things to some patients, and others just don’t understand because of their low education."  • Post-discharge follow-up: "We make sure they have everything they need when they go home, like prescriptions for dressings and wound care."  • Social and financial challenges: "Some patients don’t have the financial means to continue care at home, which makes it hard for them to recover." | **Focused Coding**  • Complexity of cancer care: "Each cancer type comes with its own challenges. Breast cancer patients, for example, have emotional struggles, while colorectal cancer patients have to learn how to live with a colostomy."  • Patient education and empowerment: "Educating patients is a big part of what we do, whether it’s showing them how to care for their wound or encouraging them to exercise after surgery."  • Socioeconomic disparities: "The rich patients usually do better because they can afford all the care they need. The poorer ones struggle because they can’t pay for home care or medications."  • Emotional and psychological needs: "A lot of the breast cancer patients get really depressed because of how they look after surgery. It’s hard for them to accept their new body."  • Challenges in communication: "Some patients don’t speak the same language, or they don’t have the education to understand what we’re trying to teach them. That makes it really difficult."  • Role of nurses in adapting care: "We have to adapt how we care for each patient. Some need more emotional support, while others need more practical help with things like stoma care." | **Theoretical Coding**  • Adaptation to patient needs: "Not all patients respond the same way. Some need constant reassurance, others need technical advice, and we have to adjust our approach."  • Barriers to effective care: "The main barriers we face are language issues, financial problems, and the fact that some patients just refuse the care they need, like the colostomy bags."  • Empowerment through education: "Our main goal is to teach patients how to take care of themselves once they leave the hospital, whether that’s managing their wounds or doing exercises."  • Socioeconomic and psychological disparities: "It’s heartbreaking when a patient can’t afford the care they need at home, especially when we know they could do better with the right support."  Core Category  • "Adaptive Care in the Face of Complex Barriers": "As nurses, we have to be flexible and adapt our care to each patient’s situation. Whether it’s financial issues, language barriers, or psychological needs, we do what we can to empower them." |  |  |
| **Fourth Participant** |  |  |  |  |
| **Initial Coding:**  **Experiences in Providing Care**   1. **Psychological and physiological care**: "We are giving total care, that means, we are first psychological, then physiological – all aspects we need to fulfill for our patients." 2. **Cancer types and procedures**: "We are dealing with mainly breast cancer, colorectal and other cases like ovarian cancer, Ca endometrium." 3. **Common complications and procedures**: "Most of them need pleural pigtail insertion... need PICC line port-a-cath."   **Stages and Admission of Cancer Patients** 4. **Tumor size and condition**: "By the time they come to you... some are 4.5-5 like that." 5. **Admission based on chemotherapy and metastasis**: "We cannot do the surgery because it is spread to other parts of the body."  **Colorectal Cancer Care** 6. **Post-surgery care**: "Some are coming after surgery, after colostomy... for chemotherapy." 7. **Chemotherapy complications**: "Some are coming with post chemotherapy complication like neutropenia." | **Focused Coding:**  **Cancer Care Approaches**   1. **Comprehensive care focus**: Emphasis on both **psychological** and **physiological** support, highlighting a holistic approach. 2. **Diverse procedures**: Nurses are trained for multiple procedures like "pleural pigtail insertion" and "PICC line," signifying high involvement in technical aspects of care.   **Patient Condition** 3. **Tumor management**: Some patients undergo chemotherapy before surgery, indicating advanced cancer stages. 4. **Complications in metastatic cases**: Many patients present with advanced cancer, often with **fungating wounds**, limiting surgical options.  **Support Systems** 5. **Colorectal care**: Post-colostomy and chemotherapy cases often involve managing severe side effects. 6. **Educational and psychological disparities**: Some patients are well-educated, others remain uninformed, especially due to family involvement in withholding diagnosis. | **Theoretical Coding:**   1. **Comprehensive cancer care**: Nurses adopt a **holistic model** that involves psychological, physiological, and procedural care, ensuring patients’ multifaceted needs are met. 2. **Stages of cancer and complexity of care**: The progression from initial diagnosis to metastasis, and the increasing complexity of care, presents significant challenges in patient management. 3. **Role of education in patient empowerment**: Patient and family education plays a crucial role in care management, with disparities in **health literacy** affecting outcomes.   **Core Category:**  The core category identified is **Holistic Empowerment in Cancer Care**. This encapsulates the comprehensive approach to managing both the psychological and physiological aspects of care, particularly for advanced cancer patients. The coding emphasizes the importance of **education, resource availability**, and the challenges posed by **staff and supply shortages**, reflecting on how these factors influence patient outcomes and self-management post-discharge. |  |  |
| **Fifth Participant** |  |  |  |  |
| **1. Initial Coding**  **Initial Codes**:   - **Patients from Different Nationalities/Backgrounds**   - *Quotation*: "We have a lot of patients coming from different backgrounds, different cultures, different nationalities." - **Generalized Weakness Due to Radiation**   - *Quotation*: "Usually, they have fatigue, weakness, generalized weakness, anemia, poor appetite, dysphagia, or skin disorders because of the radiation complication." - **Education System for Self-Care**   - *Quotation*: "We have our education system. We educate patients during admission... We orient patients about the procedures about the self-care at home after discharge." - **Charitable Support for Non-Kuwaiti Patients**   - *Quotation*: "We refer them to Al Sidra or social worker, even to provide them for transportation, sometimes for financial help." | **2. Focused Coding**  **Focused Codes**:   - **Patient Education**   - *Quotation*: "We orient patients about the procedures about the self-care at home after discharge, skin care, oral care and we have pamphlets, we have the brochures, we will give to patients." - **Post-Treatment Complications**   - *Quotation*: "Usually after surgery, if patient for surgery, sometimes there will be some complication like bleeding, wound infection... and for radiation therapy patient after one month usually skin redness then may it will go to wet desquamation." - **Family Involvement in Care**   - *Quotation*: "Some patients, they have companions we teach them about the subcutaneous injection... and we give the number and the clinic number, appointment and about medication." | 3. Theoretical Coding  Theoretical Codes:  • Empowerment Through Education and Family Support  o Quotation: "We educate patients during admission... We teach them how to prepare it with water and salt and take oral care and inspect their body and if any changes to come to hospital for follow-up."  • Resource Limitations Affecting Care  o Quotation: "Some patient they have difficulty to find out the medication, cancer medication very expensive... in these cases they will refer them to some charity to get the medicine."  • Cultural and Socio-economic Differences Impact Care  o Quotation: "Patients from different backgrounds, different cultures, different nationalities. There are Indian, Arab countries, Jordanian, Egyptian, Iranian."  4. **Core Category**  **Core Category:**  • Empowerment and Challenges in Self-Care Management for Cancer Patients  o Quotation: "We orient patients about the procedures about the self-care at home after discharge... Education, family support, and healthcare resources are critical in empowering cancer patients, but socio-economic and institutional challenges pose barriers." |  |  |
| **Sixth Participant** |  |  |  |  |
| **Initial Coding**  Initial coding involves breaking down the text into discrete parts, closely examining them, and categorizing them based on their content.  1. Diet After Surgery  o Total Parenteral Nutrition (TPN): "Patients who have undergone major surgeries may require total parenteral nutrition (TPN) initially."  o Gradual Diet Progression: "Diet progresses from clear fluids to full fluids, soft foods, and eventually to a normal diet."  o Weight Monitoring: "For patients losing weight post-surgery, regular weight monitoring and diet adjustments are made by a dietitian."  o Nutritional Supplements: "Modern supplements are provided in liquid form rather than powders."  2. Self-Care and Education  o Smoking Cessation: "Patients are educated on quitting smoking."  o Family Education: "Family members are advised to seek medical advice if experiencing symptoms."  o Ostomy Care Education: "Detailed instructions on managing ostomy care, including bag attachment and use of supplies."  o Caregiver Support: "Health care workers may be arranged for additional help if needed."  o Caregiver Assessment: "Evaluating if patients have caregivers or family members for assistance."  o Home Health Care Education: "Education provided to caregivers or arrangement of home health care services if necessary."  3. Facilities and Support  o Technological and Social Media Support: "Information about colorectal cancer is spread through social media."  o Diagnostic Tools: "Use of tumor markers and other diagnostic tools for early detection."  o Multidisciplinary Team (MDT): "Includes surgical, medical, and radiation oncology specialists."  o Follow-Up Care: "Follow-up appointments may occur in the afternoon or evening."  4. Challenges and Limitations  o Patient Acceptance: "Some patients struggle with accepting their cancer diagnosis."  o Language Barriers: "Lack of Arabic-speaking staff affects patient education and support."  o Lack of Translators and Social Workers: "Absence of dedicated translators and social workers limits support provided."  5. Complications and Recurrence  o Post-Treatment Complications: "Some patients may develop secondary cancers or complications years after treatment."  o Comorbidities: "Common conditions like diabetes, hypertension, and asthma can complicate recovery."  o Surgical Complications: "After low anterior resection (LAR), some patients may require additional procedures like abdominoperineal resection (APR) if recurrences occur."  6. Final Thoughts  o Specialized Focus: "With primary treatments moving to general hospitals, KCC now focuses on specialized surgeries."  o Patient Education: "Emphasis on educating patients about family history, lifestyle habits, and early symptom recognition." | **Focused Coding**  Focused coding involves sorting, synthesizing, and organizing the initial codes into categories.  1. Diet and Nutritional Support  o Total Parenteral Nutrition (TPN): "Patients who have undergone major surgeries may require total parenteral nutrition (TPN) initially."  o Diet Progression and Monitoring: "Diet progresses from clear fluids to full fluids, soft foods, and eventually to a normal diet." "For patients losing weight post-surgery, regular weight monitoring and diet adjustments are made by a dietitian."  o Nutritional Supplements: "Modern supplements are provided in liquid form rather than powders."  2. Patient and Family Education  o Self-Care: "Patients are educated on quitting smoking." "Family members are advised to seek medical advice if experiencing symptoms."  o Ostomy Care: "Detailed instructions on managing ostomy care, including bag attachment and use of supplies." "Health care workers may be arranged for additional help if needed."  o Caregiver Support: "Evaluating if patients have caregivers or family members for assistance." "Education provided to caregivers or arrangement of home health care services if necessary."  3. Health Facilities and Support Systems  o Technological and Social Media Support: "Information about colorectal cancer is spread through social media." "Use of tumor markers and other diagnostic tools for early detection."  o Multidisciplinary Team (MDT): "Includes surgical, medical, and radiation oncology specialists."  o Follow-Up Care: "Follow-up appointments may occur in the afternoon or evening."  4. Challenges in Patient Management  o Acceptance and Communication: "Some patients struggle with accepting their cancer diagnosis." "Lack of Arabic-speaking staff affects patient education and support."  o Resource Limitations: "Absence of dedicated translators and social workers limits support provided."  5. Complications and Recurrence  o Post-Treatment: "Some patients may develop secondary cancers or complications years after treatment."  o Comorbidities and Surgical Issues: "Common conditions like diabetes, hypertension, and asthma can complicate recovery." "After low anterior resection (LAR), some patients may require additional procedures like abdominoperineal resection (APR) if recurrences occur."  6. System and Educational Gaps  o Specialized Care Focus: "With primary treatments moving to general hospitals, KCC now focuses on specialized surgeries."  o Education Emphasis: "Emphasis on educating patients about family history, lifestyle habits, and early symptom recognition." | Theoretical Coding  Theoretical coding integrates focused codes into a conceptual framework, identifying relationships and patterns.  1. Integrated Care Approach  o Patient Education and Support Systems: Effective management of post-surgery patients involves a combination of comprehensive dietary support, patient and family education, and caregiver involvement.  o Facility and Resource Utilization: The integration of technological advancements and multidisciplinary support systems is crucial for effective patient care and follow-up.  2. Challenges and Systemic Issues  o Acceptance and Communication Barriers: Patients' ability to accept their condition and communicate effectively with healthcare providers are central to successful management and recovery.  o Resource Limitations: Lack of specific support resources like translators and social workers impacts the quality of patient education and care.  3. Complications and Long-Term Management  o Post-Treatment Complications: Managing complications and recurrences requires a robust follow-up system and personalized care adjustments.  o Comorbidities and Surgical Outcomes: Comorbid conditions and surgical outcomes significantly influence patient recovery and long-term health.  Core Category  Core Category: Holistic Patient Management and Systemic Challenges in Cancer Care  • **Core Category Explanation: The core category encapsulates** the comprehensive approach required for effective cancer care, including dietary management, patient education, and multidisciplinary support, while highlighting systemic challenges like communication barriers and resource limitations. |  |  |
| **Seventh Participant** |  |  |  |  |
| **Initial Coding**  **1. Body Image Concerns**   - *"For breast cancer basically their concern would be like what will happen to me after the surgery, I lost a breast or I will be losing bilateral breast, so what would happen to me?"* - *"Their concern is that people might judge them, like when they see us without our breast, or our spouses would see us."*   **2. Adjustment to Ostomy Care**   - *"For colorectal cancer of course their main concern, what I have encountered the most is, they're not passing stool through the normal way."* - *"They will have colostomy, ileostomy and their major concern is how to handle such, for example, I'll be passing stool through this pouch, who's going to change for me all this?"*   **3. Psychological and Emotional Support**   - *"We offer them some psychological help. In our KCCC we can get psychological help from our Alsidra, it's a non-governmental organization."* - *"Sometimes they provide for them some silicone bra that they can use after the surgery in which they can at least mask their appearance of having no breast."*   **4. Patient Education and Empowerment**   - *"We constantly give them health teaching. If we have ample of time be with them, sit with them, discuss with them what they can do, or how to empower them like to be self-reliant or to be able to do self-management of their condition in the home."* - *"Often, for breast cancer patients, for example who underwent already mastectomy we - with the help of our physiotherapist and the other people who help us - discuss with them how to perform this postmastectomy arm exercises."*   **5. Family Involvement**   - *"We also include the family members when we give health education. As much as we can, we try to include the significant others - the relatives and the family."* - *"There are patients that we have encountered, that they will be frank or straightforward with us and tell, 'No, I don't want to do it by myself.'”*   **6. Technology and Resources**   - *"Basically, we provide them with brochures. Since, not all patients are Arabic speaking, they do provide the English version and Arabic version."* - *"With the advent of technology they all know - almost all patients try to Google everything – so, sometimes when they Google and they can see in, they will ask us, 'Is it true?', 'Shall we discuss about this thing, because I have seen the Google like this?'”*   **7. Obstacles and Challenges**   - *"The obstacles patients’ readiness. At first, they're not ready. So, we need to give them ample amount of time to be ready."* - *"There are some relatives who are not cooperative with us. When we try to include them in the plan of care and the discharge teaching they will tell to us, 'No, I'm not staying with her, or I don't have time to be with her, like that.'”*   **8. Complications and Follow-Up Care**   - *"50% when it comes to seroma collection, they come back after discharge."* - *"Complications of this is having the site is getting infected, and the main reason is even though we have taught them upon discharge how to measure the stoma and how much to cut from the base plate still some of the patients don't follow it."* | **Focused Coding**  **1. Emotional Impact and Body Image**   - *"Their concern is that people might judge them, like when they see us without our breast, or our spouses would see us."* - *"For colorectal cancer of course their main concern, what I have encountered the most is, they're not passing stool through the normal way."*   **2. Education and Self-Management**   - *"We constantly give them health teaching. If we have ample of time be with them, sit with them, discuss with them what they can do, or how to empower them like to be self-reliant or to be able to do self-management of their condition in the home."* - *"We offer them some psychological help. In our KCCC we can get psychological help from our Alsidra, it's a non-governmental organization."*   **3. Involvement of Family and Caregivers**   - *"We also include the family members when we give health education. As much as we can, we try to include the significant others - the relatives and the family."* - *"There are patients that we have encountered, that they will be frank or straightforward with us and tell, 'No, I don't want to do it by myself.'”*   **4. Challenges and Complications**   - *"The obstacles patients’ readiness. At first, they're not ready. So, we need to give them ample amount of time to be ready."* - *"50% when it comes to seroma collection, they come back after discharge."* | **Theoretical Coding**  **1. Integration of Emotional Support and Practical Care**   - Emotional impacts such as body image issues are integrated into practical care approaches for self-management, such as providing psychological support and practical tools like silicone bras for breast cancer patients and ostomy care for colorectal patients.   - *"Their concern is that people might judge them, like when they see us without our breast, or our spouses would see us."*   - *"We offer them some psychological help. In our KCCC we can get psychological help from our Alsidra, it's a non-governmental organization."*   **2. Empowerment through Education**   - Empowering patients through education and support is crucial for effective self-management. This includes patient and family education, use of brochures, and leveraging technology for information verification.   - *"We constantly give them health teaching. If we have ample of time be with them, sit with them, discuss with them what they can do, or how to empower them like to be self-reliant or to be able to do self-management of their condition in the home."*   - *"Basically, we provide them with brochures. Since, not all patients are Arabic speaking, they do provide the English version and Arabic version."*   **3. Addressing Readiness and Challenges**   - Patient readiness and family involvement are critical factors influencing the success of self-management. Obstacles include patient reluctance and lack of support from family members.   - *"The obstacles patients’ readiness. At first, they're not ready. So, we need to give them ample amount of time to be ready."*   - *"There are some relatives who are not cooperative with us. When we try to include them in the plan of care and the discharge teaching they will tell to us, 'No, I'm not staying with her, or I don't have time to be with her, like that.'”*   **Core Category**  **Holistic Patient Care and Self-Management in Cancer Treatment**   - Effective cancer care involves addressing emotional, practical, and educational needs. Empowering patients through education and support, integrating family involvement, and overcoming challenges such as patient readiness and family support are essential for successful self-management and improved outcomes in breast and colorectal cancer care.   - *"We constantly give them health teaching. If we have ample of time be with them, sit with them, discuss with them what they can do, or how to empower them like to be self-reliant or to be able to do self-management of their condition in the home."*   - *"The obstacles patients’ readiness. At first, they're not ready. So, we need to give them ample amount of time to be ready."* |  |  |
|  |  |  |  |  |
|  |  |  |  |  |
|  |  |  |  |  |
|  |  |  |  |  |

Step 3: Theoretical Coding

In this phase, I linked the focused categories to develop a core category that explains the phenomenon.

Core Category: Empowering Cancer Patients through Education Amidst Barriers

The central focus is the commitment of healthcare providers to educate and empower cancer patients, despite facing several challenges. Nurses emphasize health education, especially related to treatment compliance, side effects management, and self-care at home. However, barriers such as language difficulties, lack of time due to staffing shortages, and insufficient educational resources (e.g., audiovisual aids) hinder the effectiveness of this empowerment process.

3. Theoretical Coding

• Care Coordination and Emotional Care: Care coordination between wards can add emotional stress to patients, requiring emotional support during transitions.

o Quote: “patients admitted at the last stage of life” combined with “emotional support.”

• Patient Empowerment and Education: Empowerment through education helps patients self-manage and cope emotionally at home, linking medical and psychosocial care.

o Quote: “We teach the caregivers how to manage at home” with “deep breathing, breathing exercises, TV programs.”

• Fear-driven Treatment Choices: Fear impacts treatment decisions, like mastectomy, which connects to both psychosocial support and body image concerns.

o Quote: “patients prefer mastectomy due to fear of recurrence” tied with “concerns about body image and husband’s reaction.”

• Community and External Support: External support such as from Al-Sidra group offers crucial emotional and financial relief for both patients and caregivers.

o Quote: “wigs and financial support provided by Al-Sidra group.”

4. Core Category

The core category ties everything together, encapsulating the central theme of the data:

Core Category: Comprehensive Cancer Care through Emotional, Educational, and Spiritual Support

This core category emphasizes how cancer care extends beyond physical treatment to include emotional, spiritual, and educational support. The interplay between managing medical complications, emotional well-being, and empowering both patients and caregivers forms the heart of oncology nursing.

• Quote: “patients admitted at the last stage of life” (medical), “emotional support” (emotional), “spiritual support for coping” (spiritual), and “We teach the caregivers how to manage at home” (educational).

Theoretical Coding

• Adaptation to patient needs: "Not all patients respond the same way. Some need constant reassurance, others need technical advice, and we have to adjust our approach."

• Barriers to effective care: "The main barriers we face are language issues, financial problems, and the fact that some patients just refuse the care they need, like the colostomy bags."

• Empowerment through education: "Our main goal is to teach patients how to take care of themselves once they leave the hospital, whether that’s managing their wounds or doing exercises."

• Socioeconomic and psychological disparities: "It’s heartbreaking when a patient can’t afford the care they need at home, especially when we know they could do better with the right support."

Core Category

• "Adaptive Care in the Face of Complex Barriers": "As nurses, we have to be flexible and adapt our care to each patient’s situation. Whether it’s financial issues, language barriers, or psychological needs, we do what we can to empower them."

Theoretical Coding:

1. Comprehensive cancer care: Nurses adopt a holistic model that involves psychological, physiological, and procedural care, ensuring patients’ multifaceted needs are met.

2. Stages of cancer and complexity of care: The progression from initial diagnosis to metastasis, and the increasing complexity of care, presents significant challenges in patient management.

3. Role of education in patient empowerment: Patient and family education plays a crucial role in care management, with disparities in health literacy affecting outcomes.

Core Category:

The core category identified is Holistic Empowerment in Cancer Care. This encapsulates the comprehensive approach to managing both the psychological and physiological aspects of care, particularly for advanced cancer patients. The coding emphasizes the importance of education, resource availability, and the challenges posed by staff and supply shortages, reflecting on how these factors influence patient outcomes and self-management post-discharge.

3. Theoretical Coding

Theoretical Codes:

• Empowerment Through Education and Family Support

o Quotation: "We educate patients during admission... We teach them how to prepare it with water and salt and take oral care and inspect their body and if any changes to come to hospital for follow-up."

• Resource Limitations Affecting Care

o Quotation: "Some patient they have difficulty to find out the medication, cancer medication very expensive... in these cases they will refer them to some charity to get the medicine."

• Cultural and Socio-economic Differences Impact Care

o Quotation: "Patients from different backgrounds, different cultures, different nationalities. There are Indian, Arab countries, Jordanian, Egyptian, Iranian."

4. Core Category

Core Category:

• Empowerment and Challenges in Self-Care Management for Cancer Patients

o Quotation: "We orient patients about the procedures about the self-care at home after discharge... Education, family support, and healthcare resources are critical in empowering cancer patients, but socio-economic and institutional challenges pose barriers."

Theoretical Coding

Theoretical coding integrates focused codes into a conceptual framework, identifying relationships and patterns.

1. Integrated Care Approach

o Patient Education and Support Systems: Effective management of post-surgery patients involves a combination of comprehensive dietary support, patient and family education, and caregiver involvement.

o Facility and Resource Utilization: The integration of technological advancements and multidisciplinary support systems is crucial for effective patient care and follow-up.

2. Challenges and Systemic Issues

o Acceptance and Communication Barriers: Patients' ability to accept their condition and communicate effectively with healthcare providers are central to successful management and recovery.

o Resource Limitations: Lack of specific support resources like translators and social workers impacts the quality of patient education and care.

3. Complications and Long-Term Management

o Post-Treatment Complications: Managing complications and recurrences requires a robust follow-up system and personalized care adjustments.

o Comorbidities and Surgical Outcomes: Comorbid conditions and surgical outcomes significantly influence patient recovery and long-term health.

Core Category

Core Category: Holistic Patient Management and Systemic Challenges in Cancer Care

• Core Category Explanation: The core category encapsulates the comprehensive approach required for effective cancer care, including dietary management, patient education, and multidisciplinary support, while highlighting systemic challenges like communication barriers and resource limitations.

Theoretical Coding

1. Integration of Emotional Support and Practical Care

• Emotional impacts such as body image issues are integrated into practical care approaches for self-management, such as providing psychological support and practical tools like silicone bras for breast cancer patients and ostomy care for colorectal patients.

o "Their concern is that people might judge them, like when they see us without our breast, or our spouses would see us."

o "We offer them some psychological help. In our KCCC we can get psychological help from our Alsidra, it's a non-governmental organization."

2. Empowerment through Education

• Empowering patients through education and support is crucial for effective self-management. This includes patient and family education, use of brochures, and leveraging technology for information verification.

o "We constantly give them health teaching. If we have ample of time be with them, sit with them, discuss with them what they can do, or how to empower them like to be self-reliant or to be able to do self-management of their condition in the home."

o "Basically, we provide them with brochures. Since, not all patients are Arabic speaking, they do provide the English version and Arabic version."

3. Addressing Readiness and Challenges

• Patient readiness and family involvement are critical factors influencing the success of self-management. Obstacles include patient reluctance and lack of support from family members.

o "The obstacles patients’ readiness. At first, they're not ready. So, we need to give them ample amount of time to be ready."

o "There are some relatives who are not cooperative with us. When we try to include them in the plan of care and the discharge teaching they will tell to us, 'No, I'm not staying with her, or I don't have time to be with her, like that.'”

Core Category

Holistic Patient Care and Self-Management in Cancer Treatment

• Effective cancer care involves addressing emotional, practical, and educational needs. Empowering patients through education and support, integrating family involvement, and overcoming challenges such as patient readiness and family support are essential for successful self-management and improved outcomes in breast and colorectal cancer care.

o "We constantly give them health teaching. If we have ample of time be with them, sit with them, discuss with them what they can do, or how to empower them like to be self-reliant or to be able to do self-management of their condition in the home."

o "The obstacles patients’ readiness. At first, they're not ready. So, we need to give them ample amount of time to be ready."

**Core Category: Holistic Empowerment and Self-Management in Cancer Care Amidst Systemic Challenges**

This core category emphasizes the holistic, patient-centered approach that nurses employ to empower cancer patients. Central to this empowerment are patient education, emotional support, and self-care management, all of which promote autonomy and improve health outcomes. However, the delivery of effective education is frequently constrained by systemic barriers, including staffing shortages, language difficulties, and socioeconomic inequities.

The primary objective is to equip both patients and their families to manage cancer care post-discharge, despite these limitations. Comprehensive care must address the full spectrum of patient needs—medical, emotional, and educational. In oncology nursing, empowerment encompasses not only the provision of information but also emotional support and preparing families for caregiving responsibilities. Nonetheless, resource limitations and socioeconomic challenges present substantial obstacles that nurses must adeptly navigate to ensure the provision of holistic, patient-centered care.

**Theoretical Coding**

1. **Patient Empowerment Through Education and Family Support**
   - Education is a crucial component of empowerment, providing patients and their families with the tools to manage care at home. Nurses focus on both physical and emotional aspects of care.
2. **Care Coordination and Emotional Care During Transitions**
   - Transitions between care settings, particularly in late-stage cancer, often cause emotional distress for patients. Nurses address this by offering emotional support during these critical moments.
3. **Resource Limitations Affecting Care Delivery**
   - Limited resources—such as a shortage of educational materials, interpreters, and medical supplies—hinder the effectiveness of patient education. Nurses often rely on external support to fill these gaps.
4. **Cultural and Socioeconomic Disparities in Care**
   - Cultural and economic backgrounds significantly influence how patients receive care. Language barriers and financial constraints present ongoing challenges in ensuring equitable care and education.
5. **Fear-Driven Treatment Choices and Body Image Concerns**
   - Fear, particularly regarding cancer recurrence, influences treatment decisions such as mastectomy. These fears are intertwined with concerns about body image and psychological well-being.
6. **Readiness and Reluctance in Self-Management**
   - Patient readiness is essential for successful self-management. Nurses encounter obstacles when patients or their families are not prepared or willing to participate in care.
7. **Community and External Support for Emotional and Financial Relief**
   - External organizations provide essential emotional and financial support to both patients and caregivers, filling gaps left by the healthcare system.
8. **Adaptive Care to Meet Diverse Patient Needs**
   - Nurses must constantly adjust their approach based on individual patient needs, ranging from technical medical advice to emotional reassurance.

**Core Category: Holistic Empowerment and Self-Management in Cancer Care Amidst Systemic Challenges**

This core category emphasizes the holistic, patient-centered approach that nurses employ to empower cancer patients. Central to this empowerment are patient education, emotional support, and self-care management, all of which promote autonomy and improve health outcomes. However, the delivery of effective education is frequently constrained by systemic barriers, including staffing shortages, language difficulties, and socioeconomic inequities.

The primary objective is to equip both patients and their families to manage cancer care post-discharge, despite these limitations. Comprehensive care must address the full spectrum of patient needs—medical, emotional, and educational. In oncology nursing, empowerment encompasses not only the provision of information but also emotional support and preparing families for caregiving responsibilities. Nonetheless, resource limitations and socioeconomic challenges present substantial obstacles that nurses must adeptly navigate to ensure the provision of holistic, patient-centered care. The theoretical codes of this core category shed light on the complexities of patient care, emphasizing the critical role nurses play not only in delivering medical treatment but also in providing emotional support, adapting care to diverse needs, and navigating systemic challenges like resource limitations and cultural disparities.

**1. Patient Empowerment Through Health Education and Family Support**

Participants emphasized that healtheducation is pivotal in empowering patients and their families to manage care at home. This includes both practical aspects of healthcare (such as medication management) and emotional support (such as coping strategies). Nurses play a critical role in equipping families with the necessary skills to care for patients outside the hospital setting. By focusing on both the physical and emotional components of care, nurses help reduce anxiety and improve the patient's quality of life.

**2. Care Coordination and Emotional Care During Transitions**

Transitions between care settings, especially in late-stage cancer, can be emotionally overwhelming for patients. Nurses often step in to provide emotional care, which is crucial during these vulnerable moments. Emotional distress during transitions is common, and nurses help alleviate this by offering empathy, reassurance, and continuity of care.

**3. Resource Limitations Affecting Care Delivery**

- In healthcare settings with limited resources, the ability to provide comprehensive care is often compromised. A shortage of educational materials, medical supplies, and access to affordable medications can hinder effective patient education and care delivery. Nurses frequently have to bridge these gaps by seeking support from external organizations or charities.

**4. Cultural and Socioeconomic Disparities in Care**

- Cultural and socioeconomic disparities can significantly affect patient care, especially when language barriers or financial constraints are involved. Nurses must be culturally sensitive and resourceful to provide equitable care, often adjusting their communication methods or finding alternative ways to ensure all patients receive adequate education and support.

**5. Fear-Driven Treatment Choices and Body Image Concerns**

- Fear of cancer recurrence strongly influences patient treatment choices, with many opting for more aggressive treatments like mastectomy even when less invasive options may suffice. This fear is often coupled with concerns about body image and psychological well-being, particularly in cultures where physical appearance and spousal perceptions are significant.

**6. Readiness and Reluctance in Self-Management**

- Successful patient self-management depends on their readiness to take on the responsibility of their care. Nurses often encounter challenges when patients or their families are not emotionally or mentally prepared to manage their conditions. Overcoming this reluctance requires time, education, and gradual encouragement from healthcare providers.

**7. Community and External Support for Emotional and Financial Relief**

- In many cases, community organizations provide essential emotional and financial support, complementing the healthcare system. These organizations offer services such as financial assistance, counseling, or material aid, which help to alleviate some of the burdens faced by patients and their families.

**8. Adaptive Care to Meet Diverse Patient Needs**

- No two patients are alike, and nurses must adapt their care strategies to meet the unique needs of each individual. This could involve providing technical medical advice to some patients while offering constant emotional reassurance to others. The ability to adjust care based on patient responses is a key skill for healthcare providers, ensuring that care is personalized and responsive.

**Recommendations for Additional Citations**

- Include literature on cultural influences on cancer self-management in the Middle East (e.g., Salem et al., 2021).
- Add references on psychosocial interventions for cancer survivors, such as Stanton et al. (2005).
- Cite studies on the role of healthcare systems in empowering cancer survivors, e.g., Grady & Gough (2014).
